# Supplementary material
Source: publisher figshare collection journal article supplement (https://acs.figshare.com/ndownloader/files/7336874)
Supplement: Supplementary file 1 [file 7336874]

## Supporting Information

### **Nanocomposite Membranes via the Codeposition of Polydopamine/ Polyethylenimine with Silica Nanoparticles for Enhanced Mechanical Strength and High Water Permeability**

*Yan Lv,<sup>†,‡</sup> Yong Du,<sup>†,‡</sup> Wen-Ze Qiu,<sup>†,‡</sup> Zhi-Kang Xu<sup>\*,†,‡</sup>*

<sup>†</sup> MOE Key Laboratory of Macromolecular Synthesis and Functionalization, Department of Polymer Science and Engineering, Zhejiang University, Hangzhou 310027, China

<sup>‡</sup> Key Laboratory of Adsorption and Separation Materials & Technologies of Zhejiang Province, Hangzhou 310027, China

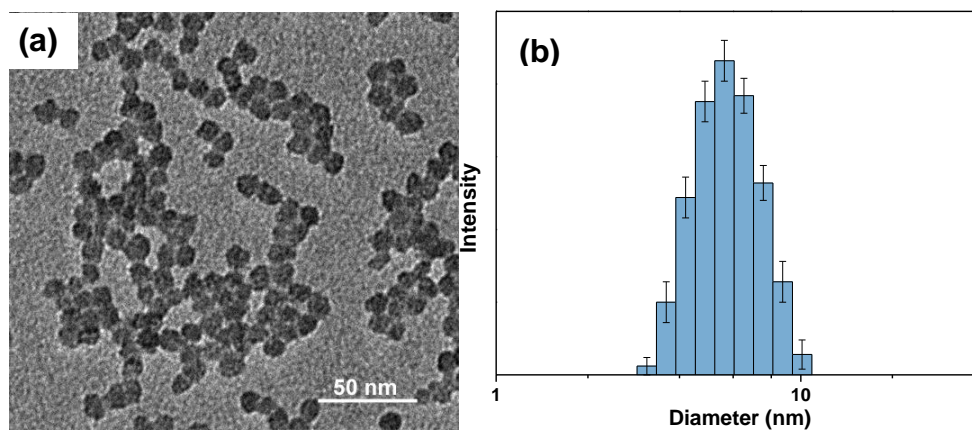

**Figure S1.** (a) TEM image and (b) size distribution of the synthesized SiO<sub>2</sub> NPs.

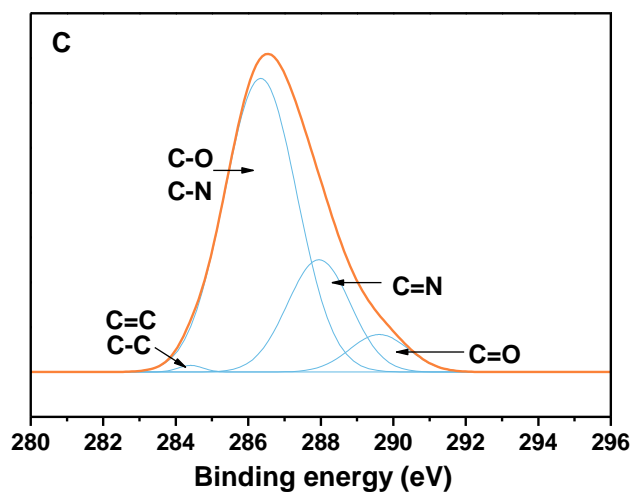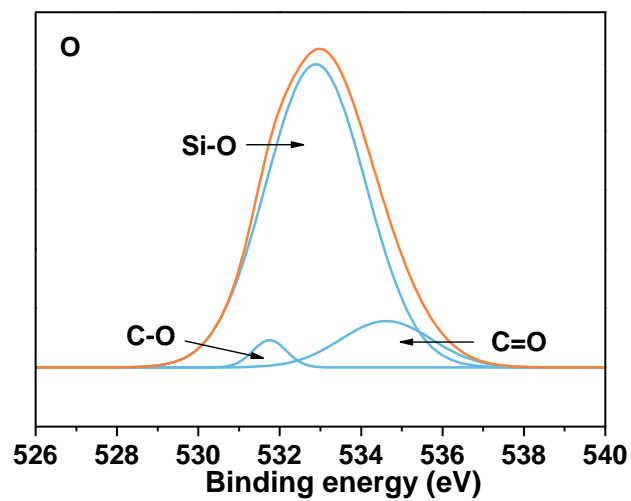

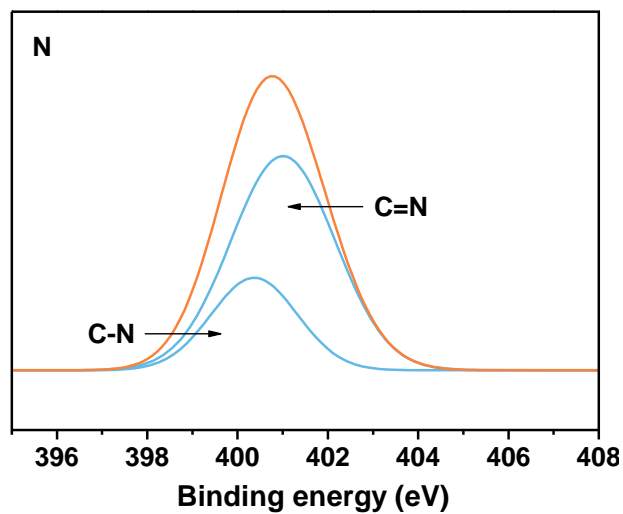

**Figure S2.** High-resolution XPS spectra of C 1s, O 1s, and N 1s region of the TFC NFMs containing SiO<sub>2</sub> NPs.

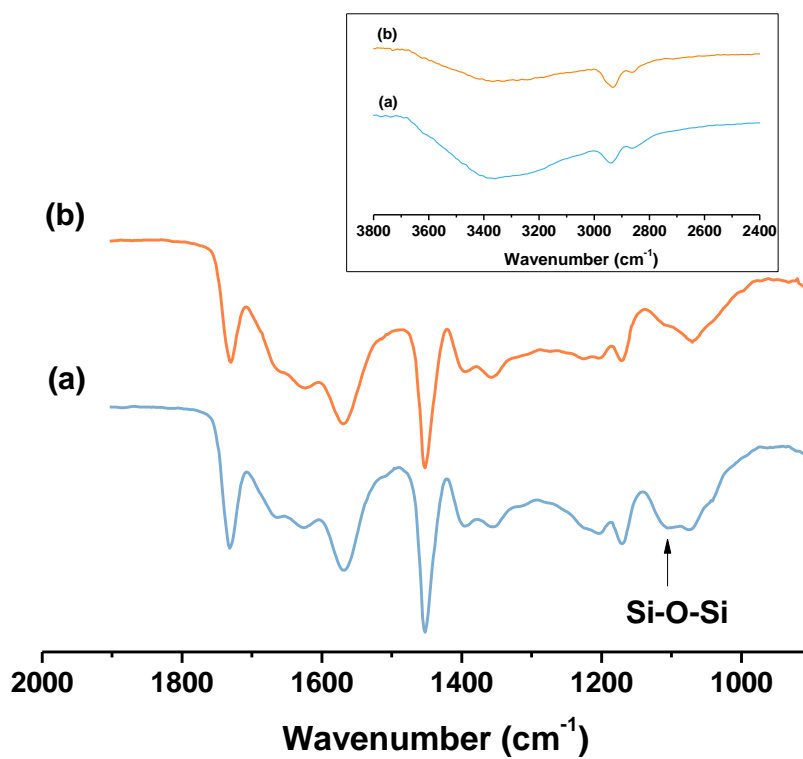

**Figure S3.** FT-IR/ATR spectra of TFC NFMs with (a) and without (b) SiO<sub>2</sub> NPs.

**Table S1** Chemical composition on the surface of the prepared membranes containing SiO<sub>2</sub> NPs at different fabrication steps from XPS spectra (in atomic percent).

| Fabrication steps | C 1s (%) | O 1s (%) | N 1s (%) | Si 2p (%) |
|-------------------|----------|----------|----------|-----------|
| Co-deposition     | 60.98    | 22.32    | 13.30    | 3.40      |
| Crosslinking      | 61.07    | 23.41    | 12.36    | 3.16      |
| Grafting          | 61.84    | 19.26    | 15.98    | 2.92      |

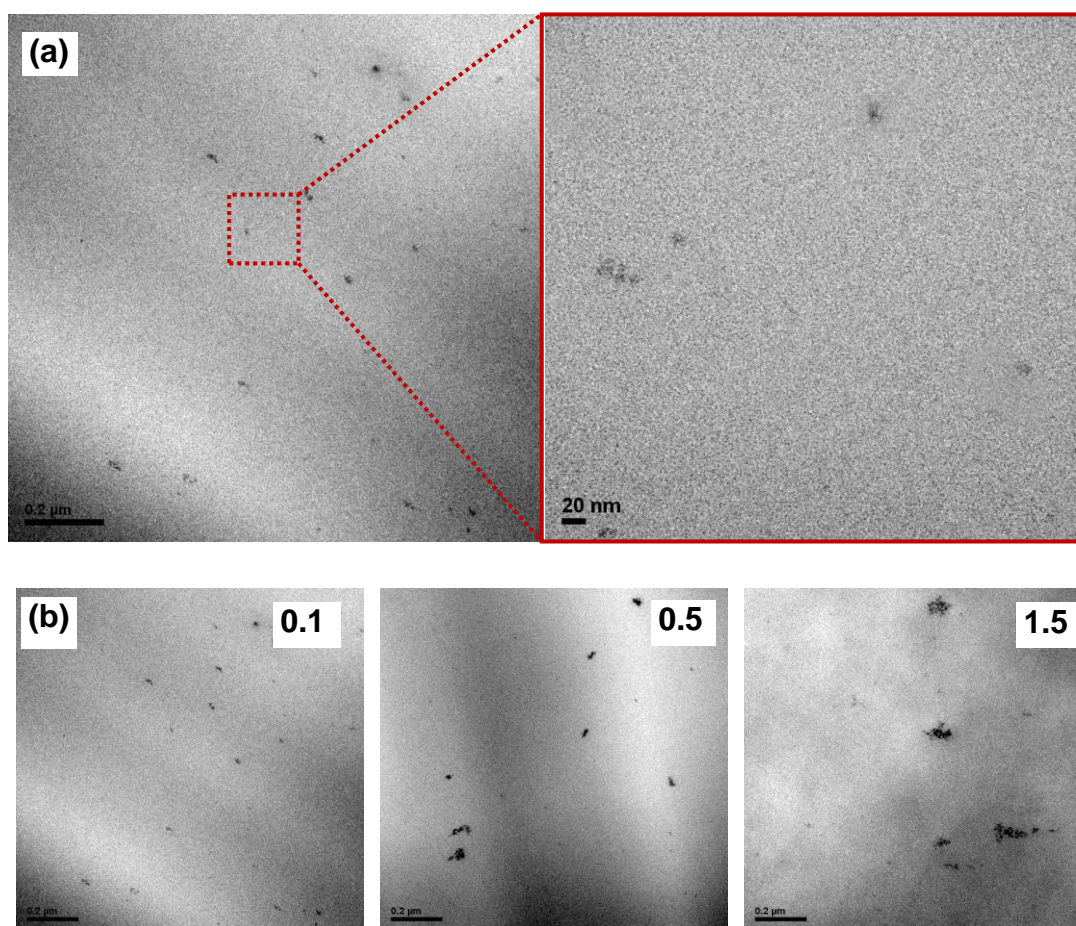

**Figure S4.** (a) TEM images from the cross-section of the TFN NFMs with separated SiO<sub>2</sub> NPs in the selective layer and (b) TEM images of the selective layer with different SiO<sub>2</sub> NP concentrations (mg/mL).

**Table S2.** The statistical mean thickness of the selective layer with different deposition times from SEM images (50000 $\times$ , SiO<sub>2</sub> NPs concentration is 0.5 mg/mL).

| Time (h) | Thickness ( $\mu\text{m}$ ) |
|----------|-----------------------------|
| 0        | $0.055 \pm 0.010$           |
| 1        | $0.242 \pm 0.037$           |
| 2        | $0.393 \pm 0.078$           |
| 3        | $0.470 \pm 0.019$           |
| 4        | $0.494 \pm 0.009$           |
| 5        | $0.553 \pm 0.076$           |
| 6        | $0.681 \pm 0.045$           |

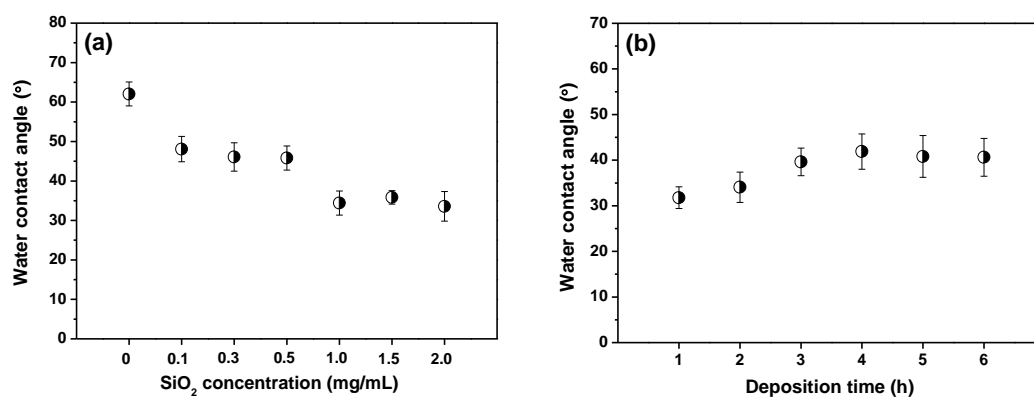

**Figure S5.** Water contact angles of the TFN NFMs prepared with (a) different SiO<sub>2</sub> NP concentrations and (b) different deposition times.

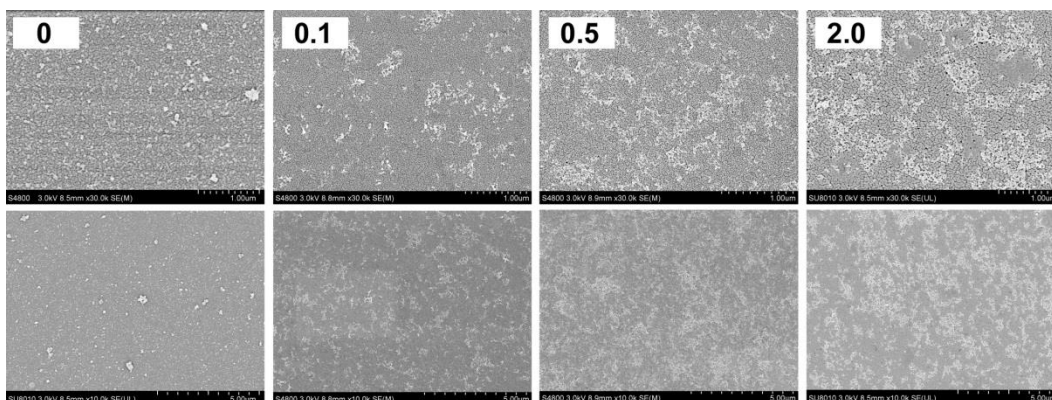

**Figure S6.** SEM images from the surfaces of the TFC NFMs with different SiO<sub>2</sub> NP concentrations (mg/mL). (deposition time is 4 h)

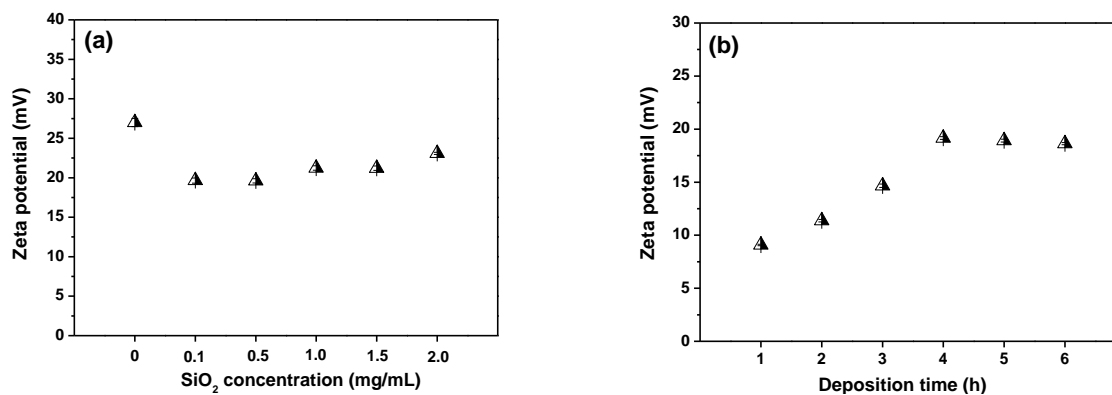

**Figure S7.**  $\xi$ -potentials at pH 6.0 for the TFC NFMs surfaces with (a) different SiO<sub>2</sub> NP concentrations and (b) different deposition times.

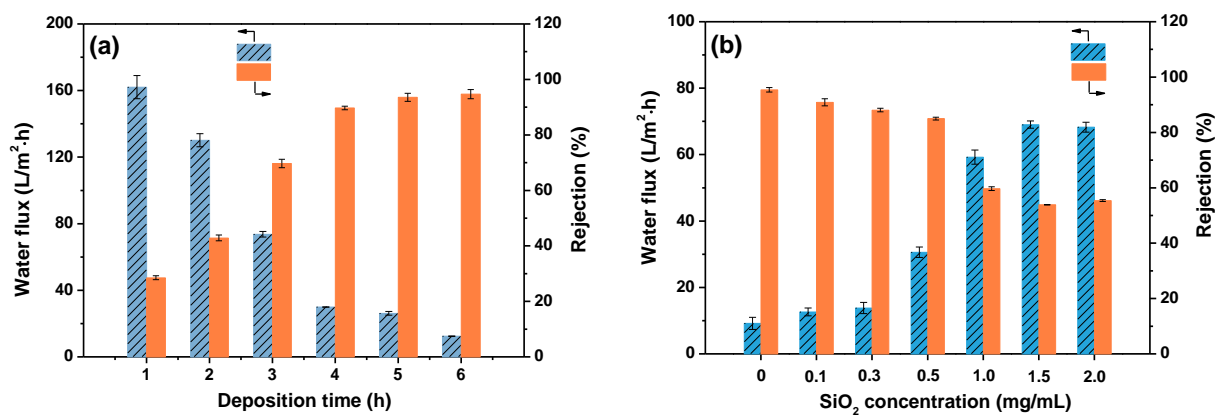

**Figure S8.** (a) Effects of the deposition time and (b) the concentration of SiO<sub>2</sub> NPs on the nanofiltration performances of the TFN NFMs. Test conditions: MgCl<sub>2</sub> concentration = 1000 mg/L, 30 °C, pH = 6, 0.6 MPa, cross-flow rate = 30 L/h.

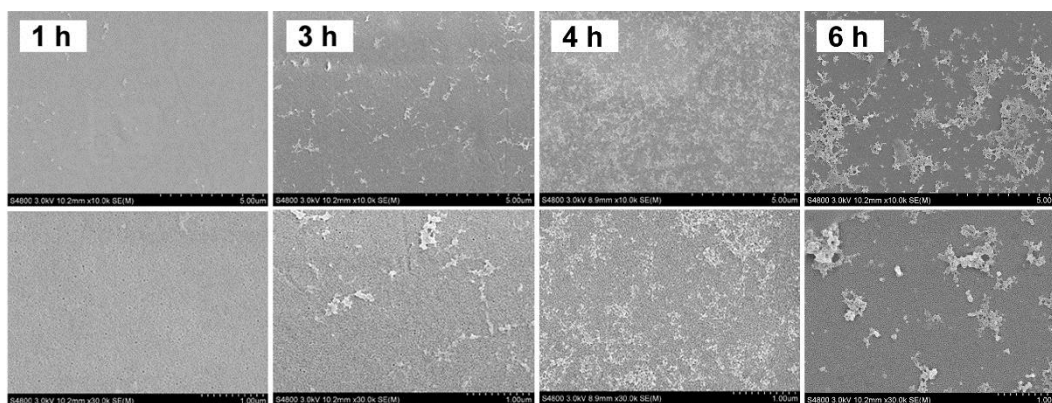

**Figure S9.** SEM images from the surfaces of the TFN NFMs with different deposition times. (SiO<sub>2</sub> NP concentration is 0.5 mg/mL).

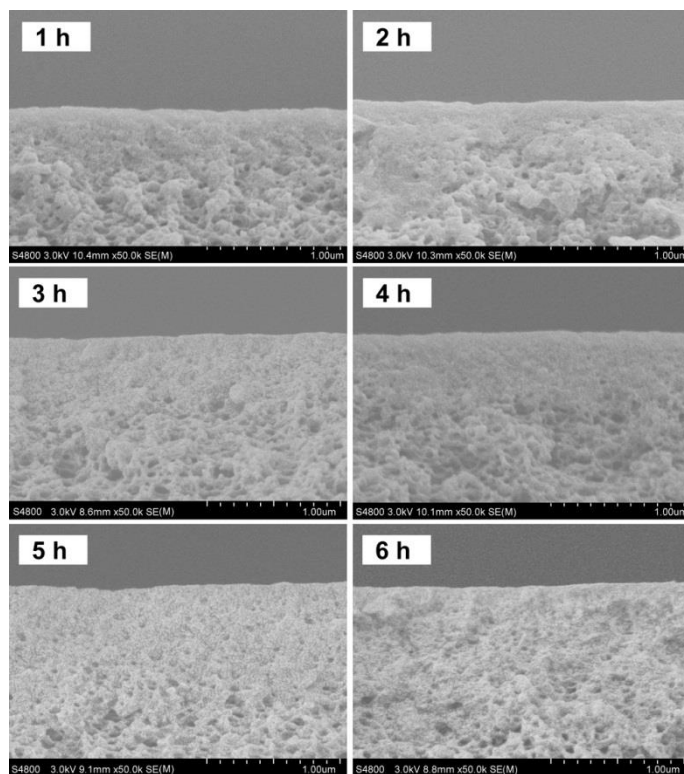

**Figure S10.** SEM images from the cross-section of the TFN NFMs with different deposition times ( $\text{SiO}_2$  NP concentration is 0.5 mg/mL).
